# Supplementary material for: Fast microwave treatments of single source alkoxides for nanostructured Li-ion battery electrodes
Source: Royal Society of Chemistry journal article supplement (doi:10.1039/c5cc07732j), 2015-10-15
Supplement: c5cc07732j1.pdf [file c5cc07732j1.pdf]

Supporting information for

## Fast microwave treatments of single source alkoxides for nanostructured Li-ion battery electrodes

Josefa Vidal Laveda,<sup>a</sup> Vibhuti Chandhok,<sup>a</sup> Claire A. Murray,<sup>b</sup> Gary W. Paterson,<sup>c</sup> Donald A. MacLaren,<sup>c</sup> and Serena A. Corr<sup>\*a</sup>

<sup>a</sup> School of Chemistry, University of Glasgow, Glasgow G12 8QQ, United Kingdom

<sup>b</sup> Diamond Light Source, Didcot, Oxfordshire, OX11 0DE, United Kingdom.

<sup>c</sup> School of Physics and Astronomy, University of Glasgow G12 8QQ, United Kingdom

### Experimental procedure

#### Synthesis of $[\text{Fe}(\text{O}^t\text{Bu})_2(\text{THF})]_2$

$\text{NaO}^t\text{Bu}$  (5.766 g, 60 mmol, Sigma Aldrich) and  $\text{FeBr}_2$  (6.470 g, 30 mmol, Sigma Aldrich) were weighed in an Ar-filled glovebox and transferred to a Schlenk flask. Dry THF (90 mL) was added and the mixture was stirred at room temperature for 24 hr. After that, a grey precipitate of NaBr was formed and the liquid phase was transferred into a separate flask using a glass syringe. Finally, the solvent was evaporated under vacuum to yield extremely air sensitive grey-greenish crystals of  $[\text{Fe}(\text{O}^t\text{Bu})_2(\text{THF})]_2$ . All the manipulations were performed under Ar using a Schlenk line.

#### Synthesis of “[ $\text{Mn}(\text{O}^t\text{Bu})_2(\text{THF})]_2$ ”

The same preparation method was followed using  $\text{NaO}^t\text{Bu}$  (5.766 g, 60 mmol, Sigma Aldrich) and  $\text{MnBr}_2$  (6.443 g, 30 mmol, Sigma Aldrich) in 90 mL of dry THF in order to synthesise the equivalent Mn-containing alkoxide “[ $\text{Mn}(\text{O}^t\text{Bu})_2(\text{THF})]_2$ ”.

#### Synthesis of “[ $\text{Fe}_{0.5}\text{Mn}_{0.5}(\text{O}^t\text{Bu})_2(\text{THF})]_2$ ”

Similar salt elimination reactions were conducted to prepare the bimetallic alkoxide “[ $\text{Fe}_{0.5}\text{Mn}_{0.5}(\text{O}^t\text{Bu})_2(\text{THF})]_2$ ”.  $\text{FeBr}_2$  (3.235 g, 15 mmol),  $\text{MnBr}_2$  (3.221 g, 15 mmol) and  $\text{NaO}^t\text{Bu}$  (5.766 g, 60 mmol) in 90 mL of dry THF were used in the preparation of “[ $\text{Fe}_{0.5}\text{Mn}_{0.5}(\text{O}^t\text{Bu})_2(\text{THF})]_2$ ”.

#### Microwave synthesis of $\text{LiFe}_{1-x}\text{Mn}_x\text{PO}_4$ ( $x=0, 0.5$ and $1$ ) nanostructures from “[ $M(\text{O}^t\text{Bu})_2(\text{THF})]_2$ ” ( $M=\text{Fe}$ or $\text{Mn}$ ) and “[ $\text{Fe}_{0.5}\text{Mn}_{0.5}(\text{O}^t\text{Bu})_2(\text{THF})]_2$ ” alkoxide precursors

In order to access the olivine  $\text{LiFe}_{1-x}\text{Mn}_x\text{PO}_4$  phases, the metal alkoxide precursors  $[\text{Fe}(\text{O}^t\text{Bu})_2(\text{THF})]_2$ , “[ $\text{Mn}(\text{O}^t\text{Bu})_2(\text{THF})]_2$ ” and “[ $\text{Fe}_{0.5}\text{Mn}_{0.5}(\text{O}^t\text{Bu})_2(\text{THF})]_2$ ” (0.030 g, 0.050 mmol) were individually mixed with  $\text{LiOH}\cdot\text{H}_2\text{O}$  (0.007 g, 0.150 mmol, Sigma Aldrich) and crystalline  $\text{H}_3\text{PO}_4$  (0.015 g, 0.150 mmol, Sigma Aldrich) in 4 mL of benzyl alcohol (Sigma Aldrich) and then irradiated with microwaves for 15

min at 80 °C and 10 min at 240 °C using a CEM Discover SP microwave synthesizer (2.45 GHz). The resulting products were washed thoroughly with ethanol (2 x 30 mL) and acetone (2 x 30 mL) to obtain the  $\text{LiMPO}_4$  ( $M=\text{Fe}$  and  $\text{Mn}$ ) powders. Finally, the materials were carbon coated with sucrose by mixing the obtained powders with sucrose (Sigma Aldrich) to obtain a final mixture of 15% carbon content and heating in a tube furnace for 1 hr at 700 °C under Ar flow.

### **Ultrasonic-assisted synthesis of $\text{Mn}_3\text{O}_4$ hausmannite from “[ $\text{Mn}(\text{O}^t\text{Bu})_2(\text{THF})_2$ ]” alkoxide precursor**

As previously reported by Gun'ko *et al.*, the careful hydrolysis and ultrasonic treatment of  $[\text{Fe}(\text{O}^t\text{Bu})_2(\text{THF})_2]$  affords nanoparticles of magnetite ( $\text{Fe}_3\text{O}_4$ ). In this work, the remaining “[ $\text{Mn}(\text{O}^t\text{Bu})_2(\text{THF})_2$ ]” and NaBr precipitate obtained after syringing out the “[ $\text{Mn}(\text{O}^t\text{Bu})_2(\text{THF})_2$ ]” liquid phase was hydrolysed with 60 mL of degassed  $\text{H}_2\text{O}$  and kept in the ultrasonic bath for 1 hr to yield nanostructured  $\text{Mn}_3\text{O}_4$  hausmannite. The addition of degassed  $\text{H}_2\text{O}$  and the ultrasonic treatment were repeated 6 times. After that, the obtained precipitate was washed again 4 times with 30 mL of distilled  $\text{H}_2\text{O}$  to completely remove the remaining NaBr.  $\text{Mn}_3\text{O}_4$  nanoparticles were carbon coated with sucrose by mixing the obtained powders with sucrose to obtain a final mixture of 15% carbon content. Heat treatment of the mixture at 700 °C under Ar atmosphere led to the formation of the reduced oxide MnO due to the sucrose acting as a reducing agent. C/ $\text{Mn}_3\text{O}_4$  powders were obtained simply by heating for 1 hr at 500 °C under air (heat treatment for 1 hr at 700 °C under air produced the oxidation of  $\text{Mn}_3\text{O}_4$  to  $\text{Mn}_2\text{O}_3$ ).

### **Structural characterization of $\text{LiFe}_{1-x}\text{Mn}_x\text{PO}_4$ ( $x=0, 0.5$ and $1$ ) and $\text{Mn}_3\text{O}_4$ hausmannite nanostructures**

High resolution powder x-ray diffraction (XRD) analysis of the  $\text{LiFe}_{1-x}\text{Mn}_x\text{PO}_4$  ( $x=0, 0.5$  and  $1$ ) nanostructures prepared using the “[ $M(\text{O}^t\text{Bu})_2(\text{THF})_2$ ]” ( $M=\text{Fe}$  or  $\text{Mn}$ ) and “[ $\text{Fe}_{0.5}\text{Mn}_{0.5}(\text{O}^t\text{Bu})_2(\text{THF})_2$ ]” alkoxide precursors were conducted at the I11 beamline at Diamond Light Source using 0.5 mm diameter glass capillaries. These high intensity X-rays ( $\lambda=0.825704$  Å) can probe more deeply into the sample than conventional laboratory XRD diffractometers and allow to perform a more detailed structural analysis of our materials.

Powder x-ray diffraction (XRD) characterization of the brownish  $\text{Mn}_3\text{O}_4$  hausmannite powders was carried out with a PANalytical X'Pert powder diffractometer using  $\text{Cu K}\alpha$  radiation operated at 40 kV and 40 mA. The diffraction data were collected in the  $2\theta$  range between 10 and 80° in steps size of 0.017 ( $2\theta$ ) and an integration time of 2 s per step.

### **Electron microscopy of $\text{LiFe}_{1-x}\text{Mn}_x\text{PO}_4$ ( $x=0, 0.5$ and $1$ ) and $\text{Mn}_3\text{O}_4$ hausmannite nanostructures**

Scanning electron microscopy (SEM) analysis were conducted using a Carl Zeiss Sigma variable pressure analytical SEM. SEM samples were prepared on carbon adhesive stubs and coated with 99:1 Au:Pt using a plasma sputter coater to avoid charging feedback. Transmission electron microscopy (TEM) and selected area electron diffraction (SAED) were performed on a FEI Tecnai TF20 microscope fitted with a field emission gun, operated at 200 keV. TEM samples were dispersed in ethanol and the resulting solution was then dropped onto an amorphous holey carbon coated grid.

## Electrochemical performance of $\text{LiFe}_{1-x}\text{Mn}_x\text{PO}_4$ ( $x=0$ and $0.5$ ) and $\text{Mn}_3\text{O}_4$ hausmannite nanostructures

Galvanostatic cycling with potential limitation of the electrode materials were conducted in a BioLogic VSP potentiostat using Swagelok type cells. The working electrode consisted of a mixture of  $\text{C}/\text{LiFePO}_4$  ( $\text{C}/\text{LiFe}_{0.5}\text{Mn}_{0.5}\text{PO}_4$  or  $\text{C}/\text{Mn}_3\text{O}_4$ ):carbon black KET JENBACK EC-600JD (AkzoNobel):PTFE (polytetrafluoroethylene) (Fischer Scientific) in a 60:30:10 weight ratio pressed into a pellet. A thin plate of lithium metal (Sigma Aldrich, ribbon, thickness  $x$  W 0.75 mm  $x$  45 mm 99.9% trace metal basis) was used as a counter electrode and the electrolyte solution employed was 1 M  $\text{LiPF}_6$  dissolved in EC (ethylene carbonate):DEC (dymethyl carbonate) 1:1 molar ratio (Solvionic). (De)Assembly of the electrochemical cells were performed in an Ar-filled glovebox (0.5 ppm  $\text{O}_2$ ; 0.5 ppm  $\text{H}_2\text{O}$ ). The electrodes were thoroughly washed with THF and dried prior to XRD analysis of the cycled material.

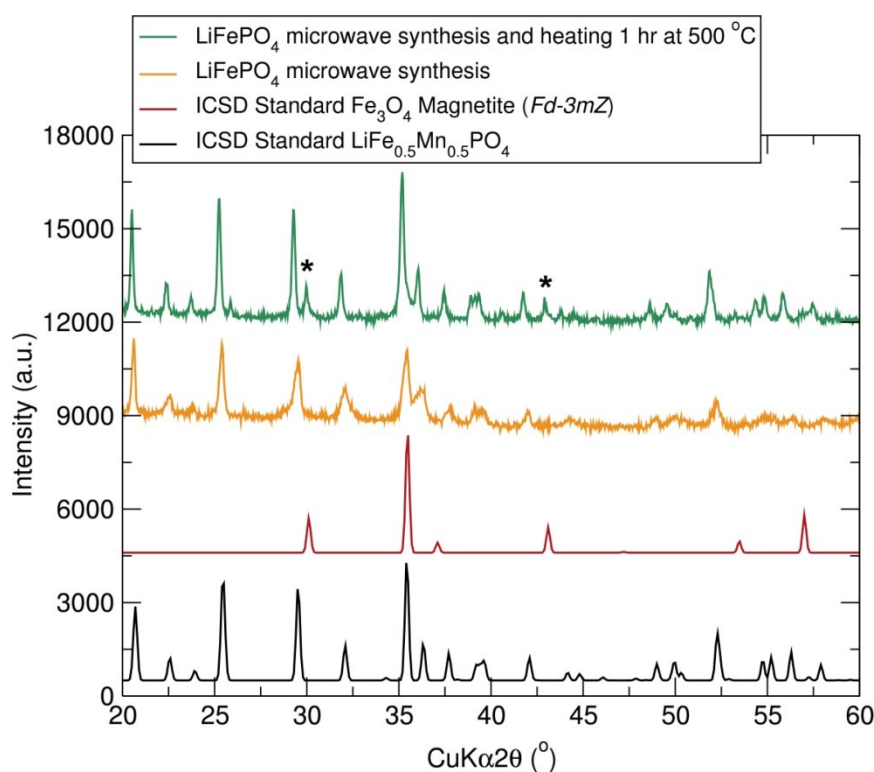

**Fig S1.** Powder XRD pattern of  $\text{LiFe}_{0.5}\text{Mn}_{0.5}\text{PO}_4$  prepared from stoichiometric mixture of  $[\text{Fe}(\text{O}^t\text{Bu})_2(\text{THF})]_2$  and  $[\text{Mn}(\text{O}^t\text{Bu})_2(\text{THF})]_2$  alkoxide precursors. \* indicates  $\text{Fe}_3\text{O}_4$  impurities.

High resolution powder XRD data of  $\text{LiFe}_{1-x}\text{Mn}_x\text{PO}_4$  ( $x=0, 0.5$  and  $1$ ) nanostructures were fit by Rietveld analysis to the orthorhombic  $Pnma$  space group using Fullprof programme. The structural and profile parameters were refined according to a Thompson-Cox-Hastings pseudo-Voigt profile function and the refinement process order was the following: (i) scale factor (ii) the background was carefully modelled using a 6-coefficient polynomial function (iii) zero point and sample displacement correction, (iv) cell parameters, (v) profile parameters, (vi) atomic positions and finally (vii) atomic thermal displacement parameters ( $B_{\text{iso}}$ )

**Table S1.** Calculated lattice parameters from Rietveld refinements for the  $\text{LiFe}_{1-x}\text{Mn}_x\text{PO}_4$  ( $x=0, 0.5$  and  $1$ ) nanostructures prepared from metal alkoxide precursors.

| Sample                | $\text{LiFePO}_4$ | $\text{LiFe}_{0.5}\text{Mn}_{0.5}\text{PO}_4$ | $\text{LiMnPO}_4$ |
|-----------------------|-------------------|-----------------------------------------------|-------------------|
| Space group           | $Pnma$            | $Pnma$                                        | $Pnma$            |
| $a$ (Å)               | 10.3267           | 10.3662                                       | 10.4492           |
| $b$ (Å)               | 6.0056            | 6.0348                                        | 6.1016            |
| $c$ (Å)               | 4.6925            | 4.7093                                        | 4.7459            |
| $V$ (Å <sup>3</sup> ) | 291.017           | 294.609                                       | 302.589           |
| $R_{\text{wp}}$       | 19.0 %            | 20.5 %                                        | 25.0 %            |
| $R_{\text{exp}}$      | 10.8 %            | 13.5 %                                        | 16.9 %            |
| $\chi^2$              | 3.107             | 2.320                                         | 2.187             |

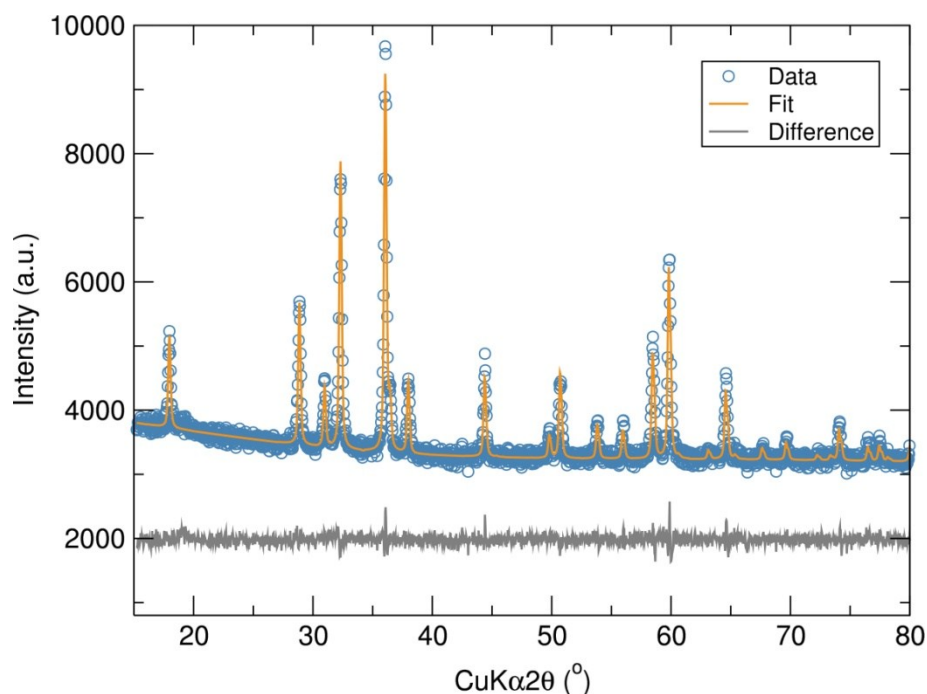

**Fig S2.** Rietveld analysis of powder XRD data from hausmannite  $\text{Mn}_3\text{O}_4$  nanoparticles [ $R_{\text{wp}}=19.5\%$ ,  $R_{\text{exp}}=15.87\%$ ,  $a=5.765502$  Å,  $b=5.765502$  Å and  $c=9.463403$  Å].

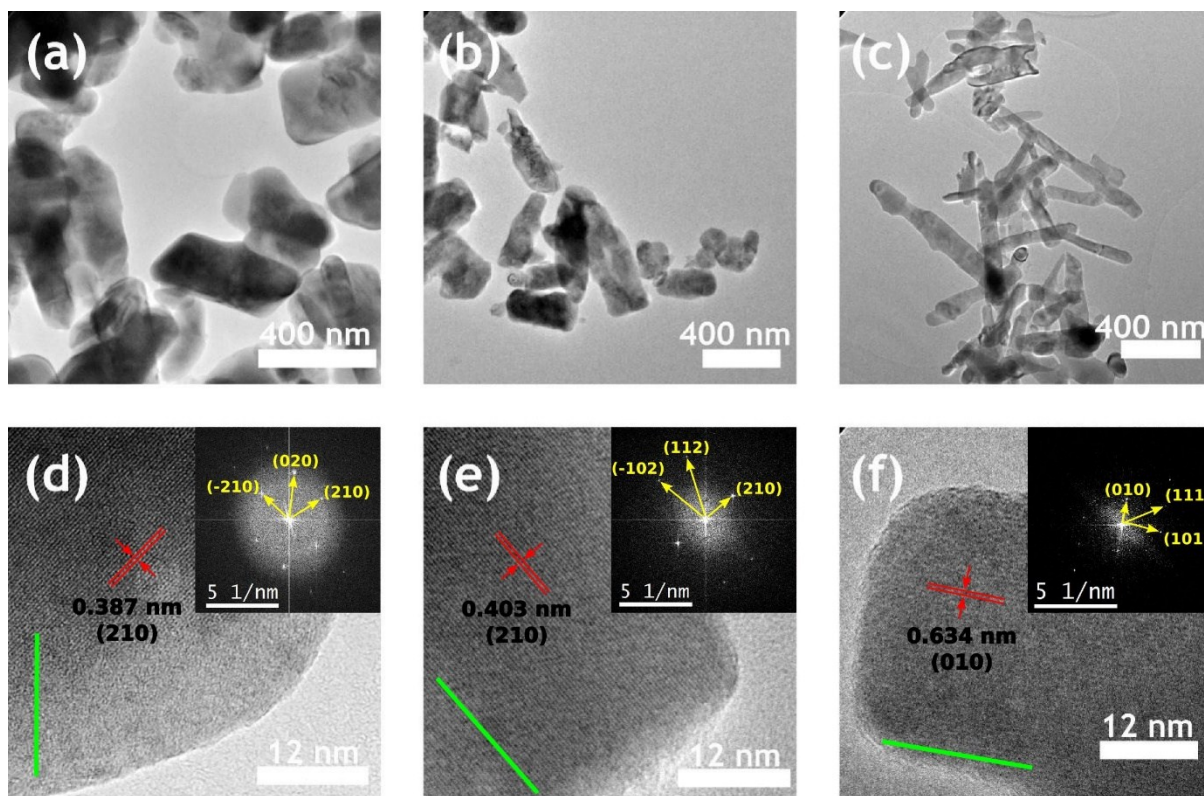

**Fig S3.** High resolution TEM images of (a) and (d)  $\text{LiFePO}_4$ , (b) and (e)  $\text{LiFe}_{0.5}\text{Mn}_{0.5}\text{PO}_4$  and (c) and (f)  $\text{LiMnPO}_4$  nanostructures prepared from metal alkoxide precursors.

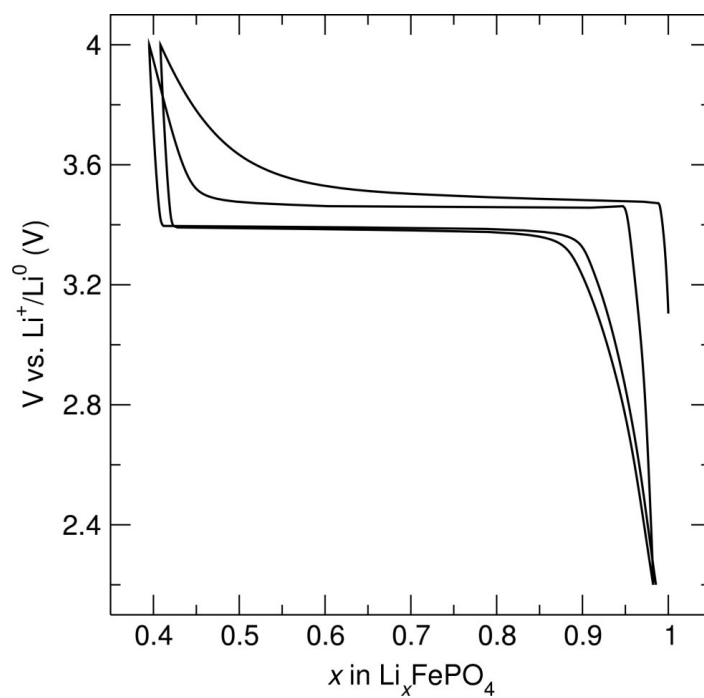

**Fig S4.** Voltage-composition profile between 2.2 and 4.0 V of  $\text{C}/\text{LiFePO}_4$  (15% C sucrose), C black and PTFE in a 60:30:10 weight ratio cycled at C/20.

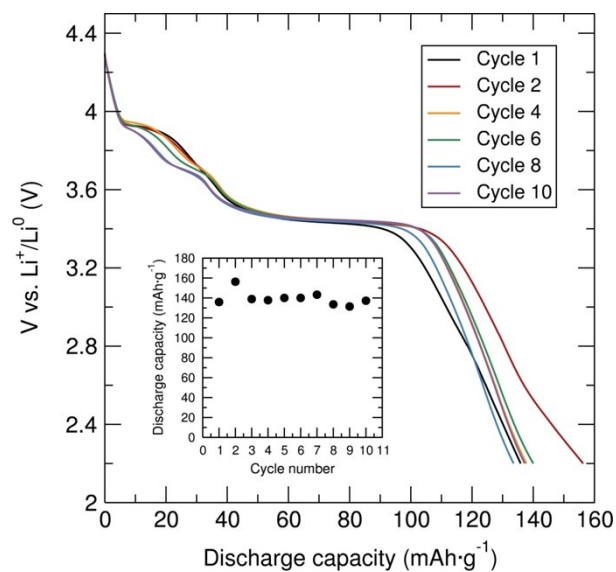

**Fig S5.** Cycling performance of C/LiFe<sub>0.5</sub>Mn<sub>0.5</sub>PO<sub>4</sub> (60% active material, 30% carbon black, 10% PTFE binder) cycled between 2.2 V and 4.0 V at C/20 rate.

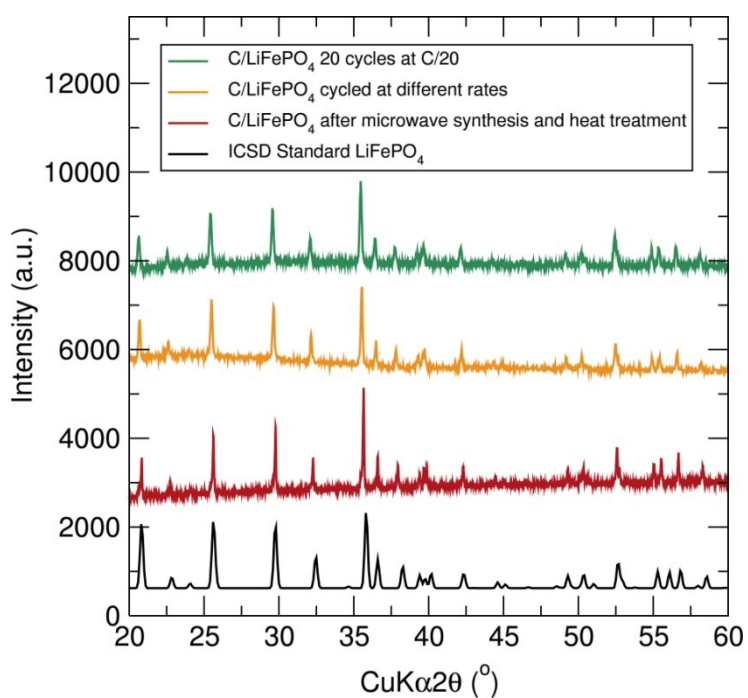

**Fig S6.** Powder XRD of cycled C/LiFePO<sub>4</sub> between 2.2 and 4.0 V at different rates and for 20 cycles at C/20 in the discharge state.

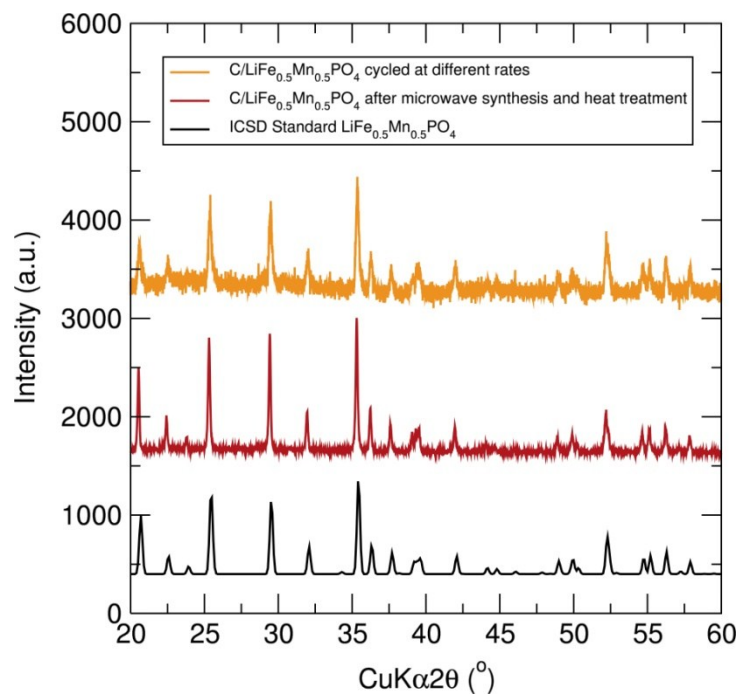

**Fig S7.** Powder XRD of cycled C/LiFe<sub>0.5</sub>Mn<sub>0.5</sub>PO<sub>4</sub> between 2.2 and 4.3 V at different rates in the discharge state.

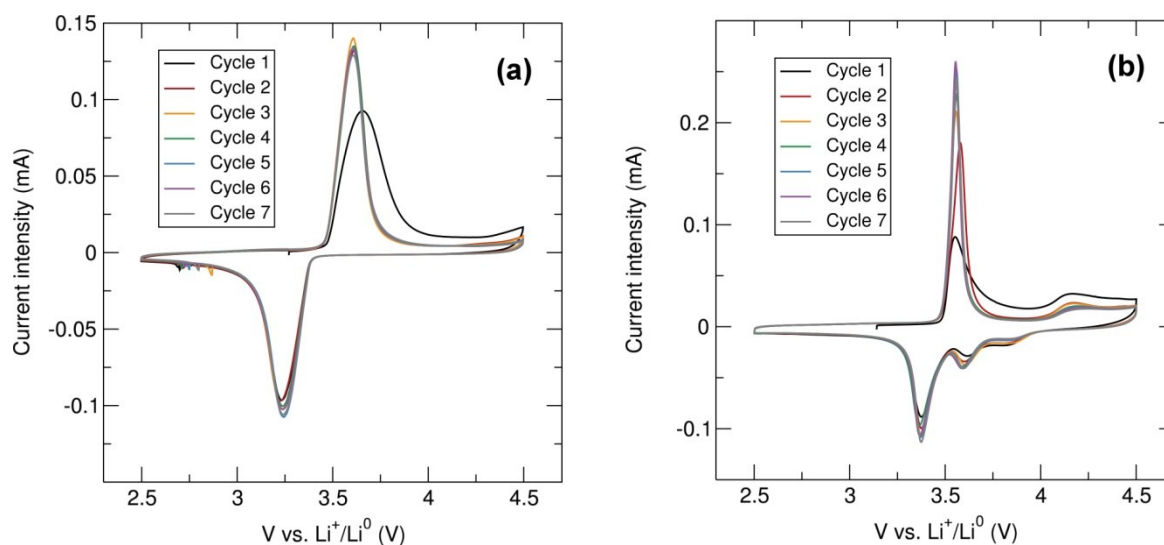

**Fig S8.** Cyclic voltammogram of (a) C/LiFePO<sub>4</sub> and (b) C/LiFe<sub>0.5</sub>Mn<sub>0.5</sub>PO<sub>4</sub> at 0.1 mV/s scan rate between 2.5 V and 4.5 V.

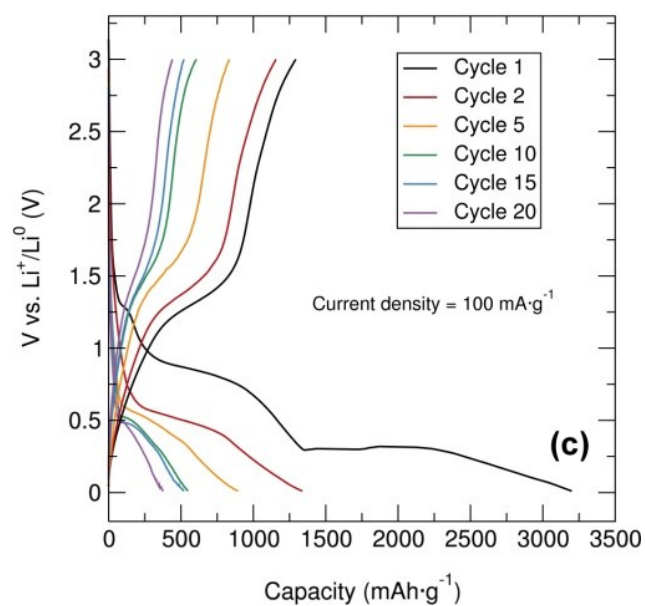

**Fig S9** Cycling performance of C/Mn<sub>3</sub>O<sub>4</sub>, C black, PTFE (60:30:10 weight ratio) over the potential range of 0.01- 3.00 V at 100 mA·g<sup>-1</sup>.

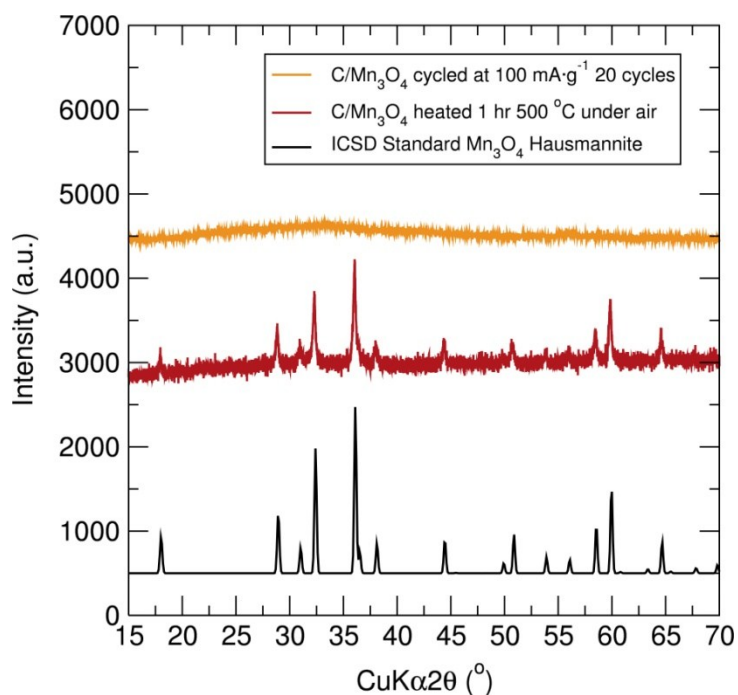

**Fig S10.** Powder XRD of C/Mn<sub>3</sub>O<sub>4</sub> hausmannite after heating for 1 hr at 500 °C and after 20 cycles between 0.01 and 3.00 V at a current density of 100 mA g<sup>-1</sup>.



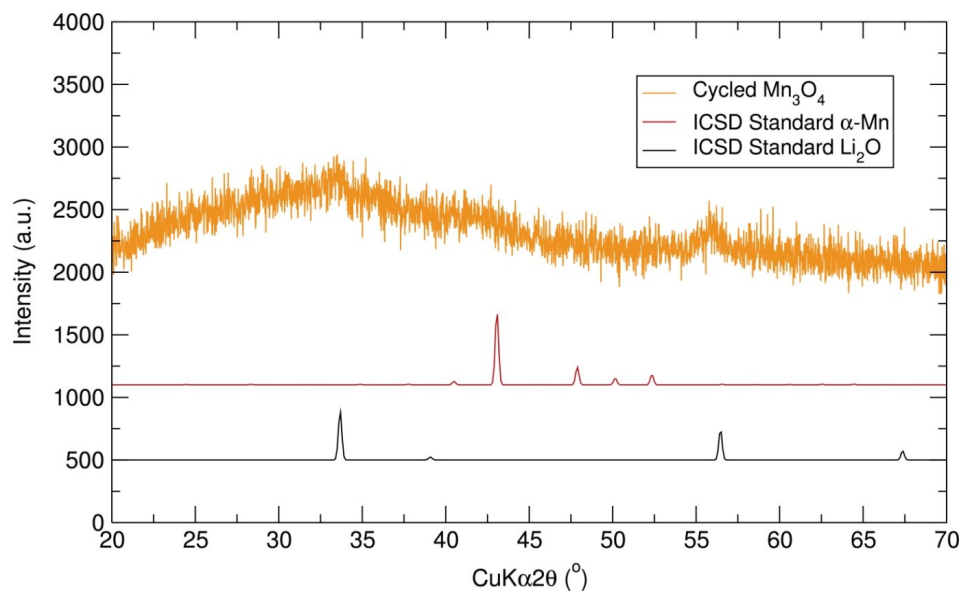

**Fig S11.** Close up of powder XRD of C/Mn<sub>3</sub>O<sub>4</sub> hausmannite after 20 cycles, showing the possible presence of conversion product Li<sub>2</sub>O after repeated cycles.

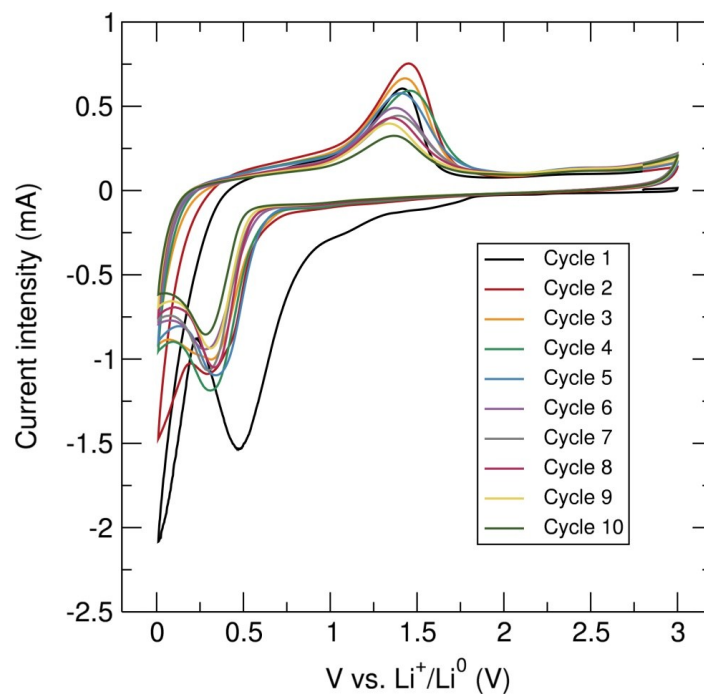

**Fig S12.** Cyclic voltammogram of C/Mn<sub>3</sub>O<sub>4</sub> hausmannite at 0.1 mV/s scan rate between 0.01 and 3.00 V.
